# Supplementary material for: Louqin Zhisou Decoction Inhibits Mucus Hypersecretion for Acute Exacerbation of Chronic Obstructive Pulmonary Disease Rats by Suppressing EGFR-PI3K-AKT Signaling Pathway and Restoring Th17/Treg Balance
Source: Evid Based Complement Alternat Med. 2019 Jan 20;2019:6471815. doi: 10.1155/2019/6471815 (PMC6360623; doi:10.1155/2019/6471815)
Supplement: Supplementary Materials — Lung Function.xlsx contains the result of FEV0.3, FVC, FEV0.3/FVC, and MVV. ABPAS.xlsx contains the result of ABPAS-positive staining areas of epithelium. ELISA.xlsx contains the result of IL-6, IL-17, IL-10, TNF-α, and TGF-β. Western Blot.xlsx contains the result of phosphorylation levels of EGFR, PI3K, and AKT and the level of MUC5AC, NE, MCP-1, RORγt, and Foxp3. RT-PCR.xlsx contains the result of relative mRNA levels of MUC5AC, NE, MCP-1, RORγt, Foxp3, IL-17, and IL-10. [file 6471815.f1.zip]

Archive with 5 entries (5 files):
- ELISA.xlsx
- Werstern Blot.xlsx
- RT-PCR.xlsx
- ABPAS.xlsx
- Lung Function.xlsx
