# Supplementary material for: Louqin Zhisou Decoction Inhibits Mucus Hypersecretion for Acute Exacerbation of Chronic Obstructive Pulmonary Disease Rats by Suppressing EGFR-PI3K-AKT Signaling Pathway and Restoring Th17/Treg Balance
Source: Evid Based Complement Alternat Med. 2019 Jan 20;2019:6471815. doi: 10.1155/2019/6471815 (PMC6360623; doi:10.1155/2019/6471815)
Supplement: Supplementary Materials — Lung Function.xlsx contains the result of FEV0.3, FVC, FEV0.3/FVC, and MVV. ABPAS.xlsx contains the result of ABPAS-positive staining areas of epithelium. ELISA.xlsx contains the result of IL-6, IL-17, IL-10, TNF-α, and TGF-β. Western Blot.xlsx contains the result of phosphorylation levels of EGFR, PI3K, and AKT and the level of MUC5AC, NE, MCP-1, RORγt, and Foxp3. RT-PCR.xlsx contains the result of relative mRNA levels of MUC5AC, NE, MCP-1, RORγt, Foxp3, IL-17, and IL-10. [file 6471815.f1.zip › ABPAS.xlsx]

## Sheet: Sheet1
Sample	ABPAS
Control1	0.03
Control2	0.01
Control3	0
Control4	0.04
Control5	0.01
Control6	0.01
AECOPD1	18.54
AECOPD2	15.36
AECOPD3	20.61
AECOPD4	19.88
AECOPD5	16.56
AECOPD6	21.44
CAM1	8.22
CAM2	4.77
CAM3	9.54
CAM4	5.69
CAM5	6.31
CAM6	7.32
LQZS1	0.61
LQZS2	1.24
LQZS3	3.29
LQZS4	0.83
LQZS5	0.37
LQZS6	2.59
