# Supplementary material for: Louqin Zhisou Decoction Inhibits Mucus Hypersecretion for Acute Exacerbation of Chronic Obstructive Pulmonary Disease Rats by Suppressing EGFR-PI3K-AKT Signaling Pathway and Restoring Th17/Treg Balance
Source: Evid Based Complement Alternat Med. 2019 Jan 20;2019:6471815. doi: 10.1155/2019/6471815 (PMC6360623; doi:10.1155/2019/6471815)
Supplement: Supplementary Materials — Lung Function.xlsx contains the result of FEV0.3, FVC, FEV0.3/FVC, and MVV. ABPAS.xlsx contains the result of ABPAS-positive staining areas of epithelium. ELISA.xlsx contains the result of IL-6, IL-17, IL-10, TNF-α, and TGF-β. Western Blot.xlsx contains the result of phosphorylation levels of EGFR, PI3K, and AKT and the level of MUC5AC, NE, MCP-1, RORγt, and Foxp3. RT-PCR.xlsx contains the result of relative mRNA levels of MUC5AC, NE, MCP-1, RORγt, Foxp3, IL-17, and IL-10. [file 6471815.f1.zip › ELISA.xlsx]

## Sheet: IL-6
Sample
pg/ml	1	2	3	4	5	6	7	8	9	10	11	12
A	2000	2000	Control1	Control1	AECOPD3	AECOPD3	CAM5	CAM5
B	1000	1000	Control2	Control2	AECOPD4	AECOPD4	CAM6	CAM6
C	500	500	Control3	Control3	AECOPD5	AECOPD5	LQZS1	LQZS1
D	250	250	Control4	Control4	AECOPD6	AECOPD6	LQZS2	LQZS2
E	125	125	Control5	Control5	CAM1	CAM1	LQZS3	LQZS3
F	62.5	62.5	Control6	Control6	CAM2	CAM2	LQZS4	LQZS4
G	31.25	31.25	AECOPD1	AECOPD1	CAM3	CAM3	LQZS5	LQZS5
H	0	0	AECOPD2	AECOPD2	CAM4	CAM4	LQZS6	LQZS6
OD（450nm）
pg/ml	1	2	3	4	5	6	7	8	9	10	11	12
A	1.288	1.287	0.042	0.043	0.062	0.06	0.046	0.044
B	0.674	0.609	0.045	0.046	0.049	0.048	0.047	0.049
C	0.319	0.315	0.044	0.045	0.052	0.052	0.044	0.047
D	0.152	0.151	0.043	0.044	0.056	0.055	0.045	0.046
E	0.098	0.095	0.046	0.047	0.045	0.047	0.043	0.041
F	0.076	0.077	0.045	0.043	0.053	0.054	0.042	0.043
G	0.045	0.046	0.054	0.054	0.046	0.044	0.047	0.048
H	0.039	0.036	0.049	0.052	0.053	0.052	0.05	0.052
OD	concentration
1.2875	2000
0.6415	1000
0.317	500
0.1515	250
0.0965	125
0.0765	62.5
0.0455	31.25
0.0375	0
Sample	OD1	OD2	OD	concentration
Control1	0.042	0.043	0.0425	36.6638
Control2	0.045	0.046	0.0455	41.4298
Control3	0.044	0.045	0.0445	39.8411
Control4	0.043	0.044	0.0435	38.2524
Control5	0.046	0.047	0.0465	43.0185
Control6	0.045	0.043	0.044	39.0468
AECOPD1	0.054	0.054	0.054	54.9338
AECOPD2	0.049	0.052	0.0505	49.3734
AECOPD3	0.062	0.06	0.061	66.0547
AECOPD4	0.049	0.048	0.0485	46.196
AECOPD5	0.052	0.052	0.052	51.7564
AECOPD6	0.056	0.055	0.0555	57.3168
CAM1	0.045	0.047	0.046	42.2242
CAM2	0.053	0.054	0.0535	54.1395
CAM3	0.046	0.044	0.045	40.6355
CAM4	0.053	0.052	0.0525	52.5508
CAM5	0.046	0.044	0.045	40.6355
CAM6	0.047	0.049	0.048	45.4016
LQZS1	0.044	0.047	0.0455	41.4298
LQZS2	0.045	0.046	0.0455	41.4298
LQZS3	0.043	0.041	0.042	35.8694
LQZS4	0.042	0.043	0.0425	36.6638
LQZS5	0.047	0.048	0.0475	44.6073
LQZS6	0.05	0.052	0.051	50.1677

## Sheet: IL-17
Sample
pg/ml	1	2	3	4	5	6	7	8	9	10	11	12
A	120	120	Control1	Control1	AECOPD3	AECOPD3	CAM5	CAM5
B	80	80	Control2	Control2	AECOPD4	AECOPD4	CAM6	CAM6
C	40	40	Control3	Control3	AECOPD5	AECOPD5	LQZS1	LQZS1
D	20	20	Control4	Control4	AECOPD6	AECOPD6	LQZS2	LQZS2
E	10	10	Control5	Control5	CAM1	CAM1	LQZS3	LQZS3
F	0	0	Control6	Control6	CAM2	CAM2	LQZS4	LQZS4
G			AECOPD1	AECOPD1	CAM3	CAM3	LQZS5	LQZS5
H			AECOPD2	AECOPD2	CAM4	CAM4	LQZS6	LQZS6
OD（450nm）
pg/ml	1	2	3	4	5	6	7	8	9	10	11	12
A	1.101	1.128	0.109	0.108	0.13	0.132	0.099	0.102
B	0.624	0.628	0.118	0.111	0.137	0.131	0.129	0.125
C	0.319	0.316	0.13	0.131	0.14	0.142	0.115	0.118
D	0.184	0.182	0.112	0.119	0.148	0.143	0.108	0.111
E	0.121	0.126	0.12	0.12	0.121	0.124	0.13	0.136
F	0.082	0.085	0.098	0.096	0.116	0.118	0.121	0.124
G			0.136	0.137	0.132	0.137	0.117	0.12
H			0.127	0.124	0.095	0.097	0.094	0.099
OD	concentration
1.1145	120
0.626	80
0.3175	40
0.183	20
0.1235	10
0.0835	0
Sample	OD1	OD2	OD	concentration
Control1	0.109	0.108	0.1085	7.65803
Control2	0.118	0.111	0.1145	8.87637
Control3	0.13	0.131	0.1305	12.1472
Control4	0.112	0.119	0.1155	9.07986
Control5	0.12	0.12	0.12	9.99712
Control6	0.098	0.096	0.097	5.33541
AECOPD1	0.136	0.137	0.1365	13.382
AECOPD2	0.127	0.124	0.1255	11.1216
AECOPD3	0.13	0.132	0.131	12.2499
AECOPD4	0.137	0.131	0.134	12.8669
AECOPD5	0.14	0.142	0.141	14.311
AECOPD6	0.148	0.143	0.1455	15.2425
CAM1	0.121	0.124	0.1225	10.5078
CAM2	0.116	0.118	0.117	9.38533
CAM3	0.132	0.137	0.1345	12.9699
CAM4	0.095	0.097	0.096	5.13422
CAM5	0.099	0.102	0.1005	6.04055
CAM6	0.129	0.125	0.127	11.429
LQZS1	0.115	0.118	0.1165	9.28348
LQZS2	0.108	0.111	0.1095	7.86077
LQZS3	0.13	0.136	0.133	12.6611
LQZS4	0.121	0.124	0.1225	10.5078
LQZS5	0.117	0.12	0.1185	9.69108
LQZS6	0.094	0.099	0.0965	5.2348

## Sheet: TNF-α
Sample
pg/ml	1	2	3	4	5	6	7	8	9	10	11	12
A	1000	1000	Control1	Control1	AECOPD3	AECOPD3	CAM5	CAM5
B	500	500	Control2	Control2	AECOPD4	AECOPD4	CAM6	CAM6
C	250	250	Control3	Control3	AECOPD5	AECOPD5	LQZS1	LQZS1
D	125	125	Control4	Control4	AECOPD6	AECOPD6	LQZS2	LQZS2
E	62.5	62.5	Control5	Control5	CAM1	CAM1	LQZS3	LQZS3
F	31.25	31.25	Control6	Control6	CAM2	CAM2	LQZS4	LQZS4
G	0	0	AECOPD1	AECOPD1	CAM3	CAM3	LQZS5	LQZS5
H			AECOPD2	AECOPD2	CAM4	CAM4	LQZS6	LQZS6
OD（450nm）
pg/ml	1	2	3	4	5	6	7	8	9	10	11	12
A	2.454	2.498	0.083	0.086	0.118	0.114	0.111	0.112
B	1.243	1.292	0.087	0.084	0.101	0.099	0.08	0.077
C	0.676	0.678	0.107	0.105	0.082	0.087	0.095	0.101
D	0.332	0.331	0.082	0.085	0.078	0.082	0.078	0.076
E	0.184	0.187	0.088	0.086	0.088	0.085	0.093	0.094
F	0.128	0.121	0.098	0.102	0.105	0.104	0.082	0.081
G	0.085	0.082	0.085	0.08	0.089	0.087	0.08	0.081
H	0.064	0.063	0.087	0.094	0.094	0.094	0.098	0.102
OD	concentration
2.476	1000
1.2675	500
0.677	250
0.3315	125
0.1855	62.5
0.1245	31.25
0.0835	0
Sample	OD1	OD2	OD	concentration
Control1	0.083	0.086	0.0845	12.9558
Control2	0.087	0.084	0.0855	13.3682
Control3	0.107	0.105	0.106	21.8224
Control4	0.082	0.085	0.0835	12.5434
Control5	0.088	0.086	0.087	13.9868
Control6	0.098	0.102	0.1	19.348
AECOPD1	0.085	0.08	0.0825	12.131
AECOPD2	0.087	0.094	0.0905	15.4302
AECOPD3	0.118	0.114	0.116	25.9464
AECOPD4	0.101	0.099	0.1	19.348
AECOPD5	0.082	0.087	0.0845	12.9558
AECOPD6	0.078	0.082	0.08	11.1
CAM1	0.088	0.085	0.0865	13.7806
CAM2	0.105	0.104	0.1045	21.2038
CAM3	0.089	0.087	0.088	14.3992
CAM4	0.094	0.094	0.094	16.8736
CAM5	0.111	0.112	0.1115	24.0906
CAM6	0.08	0.077	0.0785	10.4814
LQZS1	0.095	0.101	0.098	18.5232
LQZS2	0.078	0.076	0.077	9.8628
LQZS3	0.093	0.094	0.0935	16.6674
LQZS4	0.082	0.081	0.0815	11.7186
LQZS5	0.08	0.081	0.0805	11.3062
LQZS6	0.098	0.102	0.1	19.348

## Sheet: IL-10
Sample
pg/ml	1	2	3	4	5	6	7	8	9	10	11	12
A	4000	4000	Control1	Control1	AECOPD3	AECOPD3	CAM5	CAM5
B	2000	2000	Control2	Control2	AECOPD4	AECOPD4	CAM6	CAM6
C	1000	1000	Control3	Control3	AECOPD5	AECOPD5	LQZS1	LQZS1
D	500	500	Control4	Control4	AECOPD6	AECOPD6	LQZS2	LQZS2
E	250	250	Control5	Control5	CAM1	CAM1	LQZS3	LQZS3
F	125	125	Control6	Control6	CAM2	CAM2	LQZS4	LQZS4
G	62.5	62.5	AECOPD1	AECOPD1	CAM3	CAM3	LQZS5	LQZS5
H	0	0	AECOPD2	AECOPD2	CAM4	CAM4	LQZS6	LQZS6
OD（450nm）
pg/ml	1	2	3	4	5	6	7	8	9	10	11	12
A	2.095	2.104	0.083	0.083	0.082	0.081	0.084	0.082
B	1.169	1.108	0.081	0.082	0.082	0.082	0.084	0.087
C	0.653	0.674	0.085	0.088	0.081	0.081	0.084	0.085
D	0.346	0.349	0.083	0.085	0.086	0.085	0.082	0.081
E	0.163	0.162	0.082	0.085	0.082	0.082	0.083	0.082
F	0.122	0.121	0.083	0.083	0.083	0.082	0.084	0.085
G	0.082	0.083	0.081	0.079	0.083	0.081	0.087	0.084
H	0.069	0.063	0.082	0.085	0.081	0.082	0.084	0.083
OD	concentration
2.0995	4000
1.1385	2000
0.6635	1000
0.3475	500
0.1625	250
0.1215	125
0.0825	62.5
0.066	0
Sample	OD1	OD2	OD	concentration
Control1	0.083	0.083	0.083	19.7312
Control2	0.081	0.082	0.0815	16.8266
Control3	0.085	0.088	0.0865	26.5086
Control4	0.083	0.085	0.084	21.6676
Control5	0.082	0.085	0.0835	20.6994
Control6	0.083	0.083	0.083	19.7312
AECOPD1	0.081	0.079	0.08	13.922
AECOPD2	0.082	0.085	0.0835	20.6994
AECOPD3	0.082	0.081	0.0815	16.8266
AECOPD4	0.082	0.082	0.082	17.7948
AECOPD5	0.081	0.081	0.081	15.8584
AECOPD6	0.086	0.085	0.0855	24.5722
CAM1	0.082	0.082	0.082	17.7948
CAM2	0.083	0.082	0.0825	18.763
CAM3	0.083	0.081	0.082	17.7948
CAM4	0.081	0.082	0.0815	16.8266
CAM5	0.084	0.082	0.083	19.7312
CAM6	0.084	0.087	0.0855	24.5722
LQZS1	0.084	0.085	0.0845	22.6358
LQZS2	0.082	0.081	0.0815	16.8266
LQZS3	0.083	0.082	0.0825	18.763
LQZS4	0.084	0.085	0.0845	22.6358
LQZS5	0.087	0.084	0.0855	24.5722
LQZS6	0.084	0.083	0.0835	20.6994

## Sheet: TGF-β
Sample
pg/ml	1	2	3	4	5	6	7	8	9	10	11	12
A	2000	2000	Control1	Control1	AECOPD3	AECOPD3	CAM5	CAM5
B	1000	1000	Control2	Control2	AECOPD4	AECOPD4	CAM6	CAM6
C	500	500	Control3	Control3	AECOPD5	AECOPD5	LQZS1	LQZS1
D	250	250	Control4	Control4	AECOPD6	AECOPD6	LQZS2	LQZS2
E	125	125	Control5	Control5	CAM1	CAM1	LQZS3	LQZS3
F	62.5	62.5	Control6	Control6	CAM2	CAM2	LQZS4	LQZS4
G	31.25	31.25	AECOPD1	AECOPD1	CAM3	CAM3	LQZS5	LQZS5
H			AECOPD2	AECOPD2	CAM4	CAM4	LQZS6	LQZS6
OD（450nm）
pg/ml	1	2	3	4	5	6	7	8	9	10	11	12
A	1.227	1.088	0.082	0.087	0.08	0.082	0.086	0.088
B	0.967	0.864	0.069	0.069	0.08	0.08	0.071	0.08
C	0.709	0.449	0.065	0.067	0.082	0.087	0.08	0.087
D	0.346	0.251	0.079	0.077	0.1	0.096	0.077	0.083
E	0.145	0.135	0.082	0.087	0.087	0.089	0.078	0.083
F	0.088	0.081	0.07	0.067	0.092	0.087	0.079	0.084
G	0.069	0.069	0.102	0.098	0.103	0.082	0.08	0.086
H			0.093	0.092	0.078	0.081	0.073	0.077
OD	concentration
0.864	1000
0.449	500
0.251	250
0.135	125
0.081	62.5
0.069	31.25
Sample	OD1	OD2	OD	concentration
Control1	0.082	0.087	0.0845	58.0016
Control2	0.069	0.069	0.069	39.2823
Control3	0.065	0.067	0.066	35.6592
Control4	0.079	0.077	0.078	50.1516
Control5	0.082	0.087	0.0845	58.0016
Control6	0.07	0.067	0.0685	38.6785
AECOPD1	0.102	0.098	0.1	76.721
AECOPD2	0.093	0.092	0.0925	67.6633
AECOPD3	0.08	0.082	0.081	53.7747
AECOPD4	0.08	0.08	0.08	52.567
AECOPD5	0.082	0.087	0.0845	58.0016
AECOPD6	0.1	0.096	0.098	74.3056
CAM1	0.087	0.089	0.088	62.2286
CAM2	0.092	0.087	0.0895	64.0402
CAM3	0.103	0.082	0.0925	67.6633
CAM4	0.078	0.081	0.0795	51.9632
CAM5	0.086	0.088	0.087	61.0209
CAM6	0.071	0.08	0.0755	47.1323
LQZS1	0.08	0.087	0.0835	56.7939
LQZS2	0.077	0.083	0.08	52.567
LQZS3	0.078	0.083	0.0805	53.1709
LQZS4	0.079	0.084	0.0815	54.3786
LQZS5	0.08	0.086	0.083	56.1901
LQZS6	0.073	0.077	0.075	46.5285
