# Supplementary material for: Louqin Zhisou Decoction Inhibits Mucus Hypersecretion for Acute Exacerbation of Chronic Obstructive Pulmonary Disease Rats by Suppressing EGFR-PI3K-AKT Signaling Pathway and Restoring Th17/Treg Balance
Source: Evid Based Complement Alternat Med. 2019 Jan 20;2019:6471815. doi: 10.1155/2019/6471815 (PMC6360623; doi:10.1155/2019/6471815)
Supplement: Supplementary Materials — Lung Function.xlsx contains the result of FEV0.3, FVC, FEV0.3/FVC, and MVV. ABPAS.xlsx contains the result of ABPAS-positive staining areas of epithelium. ELISA.xlsx contains the result of IL-6, IL-17, IL-10, TNF-α, and TGF-β. Western Blot.xlsx contains the result of phosphorylation levels of EGFR, PI3K, and AKT and the level of MUC5AC, NE, MCP-1, RORγt, and Foxp3. RT-PCR.xlsx contains the result of relative mRNA levels of MUC5AC, NE, MCP-1, RORγt, Foxp3, IL-17, and IL-10. [file 6471815.f1.zip › RT-PCR.xlsx]

## Sheet: MUC5AC
Sample	GAPDH	MUC5AC	ΔCt	meanΔCt	ΔΔCt	2^(-ΔΔCt)
Control1	19.16	30.31	11.15	10.8833	0.266667	0.831238
Control2	19.73	30.53	10.8		-0.0833333	1.05946
Control3	22.81	33.78	10.97		0.0866667	0.941696
Control4	22.82	33.43	10.61		-0.273333	1.2086
Control5	19.67	30.27	10.6		-0.283333	1.217
Control6	19.88	31.05	11.17		0.286667	0.819794
COPD1	19.12	29.3	10.18		-0.703333	1.62826
COPD2	19.09	29.18	10.09		-0.793333	1.73307
COPD3	19.08	29.44	10.36		-0.523333	1.43727
COPD4	19.08	28.58	9.5		-1.38333	2.6087
COPD5	18.95	29.57	10.62		-0.263333	1.20025
COPD6	18.94	29.53	10.59		-0.293333	1.22547
CLM1	19.32	29.8	10.48		-0.403333	1.32256
CLM2	19.27	29.75	10.48		-0.403333	1.32256
CLM3	19.76	29.79	10.03		-0.853333	1.80667
CLM4	18.97	30.04	11.07		0.186667	0.878633
CLM5	19.92	30.85	10.93		0.0466667	0.968171
CLM6	19.86	30.17	10.31		-0.573333	1.48796
QJHT1	19.56	30.11	10.55		-0.333333	1.25992
QJHT2	19.94	31.32	11.38		0.496667	0.708742
QJHT3	19.62	31.13	11.51		0.626667	0.647671
QJHT4	19.92	30.58	10.66		-0.223333	1.16743
QJHT5	19.85	30.59	10.74		-0.143333	1.10445
QJHT6	19.83	31.56	11.73		0.846667	0.556068

## Sheet: RORγt
Sample	GAPDH	RORγt	ΔCt	meanΔCt	ΔΔCt	2^(-ΔΔCt)
Control1	19.16	31.84	12.68	12.1117	0.568333	0.674395
Control2	19.73	31.85	12.12		0.00833333	0.99424
Control3	22.81	34.49	11.68		-0.431667	1.34879
Control4	22.82	35.25	12.43		0.318333	0.801996
Control5	19.67	32.08	12.41		0.298333	0.813191
Control6	19.88	31.23	11.35		-0.761667	1.69545
AECOPD1	19.12	30.09	10.97		-1.14167	2.20636
AECOPD2	19.09	30.48	11.39		-0.721667	1.64909
AECOPD3	19.08	30.57	11.49		-0.621667	1.53865
AECOPD4	19.08	30.22	11.14		-0.971667	1.9611
AECOPD5	18.95	30.74	11.79		-0.321667	1.24977
AECOPD6	18.94	31.04	12.1		-0.0116667	1.00812
CAM1	19.32	30.86	11.54		-0.571667	1.48624
CAM2	19.27	31.33	12.06		-0.0516667	1.03646
CAM3	19.76	31.77	12.01		-0.101667	1.07301
CAM4	18.97	30.9	11.93		-0.181667	1.13419
CAM5	19.92	31.25	11.33		-0.781667	1.71912
CAM6	19.86	30.91	11.05		-1.06167	2.08734
LQZS1	19.56	30.94	11.38		-0.731667	1.66056
LQZS2	19.94	31.73	11.79		-0.321667	1.24977
LQZS3	19.62	31.69	12.07		-0.0416667	1.0293
LQZS4	19.92	30.64	10.72		-1.39167	2.62382
LQZS5	19.85	31.04	11.19		-0.921667	1.8943
LQZS6	19.83	32.07	12.24		0.128333	0.914888

## Sheet: Foxp3
Sample	GAPDH	Foxp3	ΔCt	meanΔCt	ΔΔCt	2^(-ΔΔCt)
Control1	19.16	25.59	6.43	6.33	0.1	0.933033
Control2	19.73	26.22	6.49		0.16	0.895025
Control3	22.81	29.2	6.39		0.06	0.959264
Control4	22.82	29.64	6.82		0.49	0.712025
Control5	19.67	25.65	5.98		-0.35	1.27456
Control6	19.88	25.75	5.87		-0.46	1.37554
AECOPD1	19.12	25.7	6.58		0.25	0.840896
AECOPD2	19.09	25.59	6.5		0.17	0.888843
AECOPD3	19.08	25.65	6.57		0.24	0.846745
AECOPD4	19.08	25.52	6.44		0.11	0.926588
AECOPD5	18.95	25.21	6.26		-0.07	1.04972
AECOPD6	18.94	25.02	6.08		-0.25	1.18921
CAM1	19.32	25.94	6.62		0.29	0.817902
CAM2	19.27	26	6.73		0.4	0.757858
CAM3	19.76	26.32	6.56		0.23	0.852635
CAM4	18.97	26.3	7.33		1	0.5
CAM5	19.92	26.33	6.41		0.08	0.946058
CAM6	19.86	26.24	6.38		0.05	0.965936
LQZS1	19.56	26.12	6.56		0.23	0.852635
LQZS2	19.94	26.5	6.56		0.23	0.852635
LQZS3	19.62	26.41	6.79		0.46	0.726986
LQZS4	19.92	26.14	6.22		-0.11	1.07923
LQZS5	19.85	26.23	6.38		0.05	0.965936
LQZS6	19.83	26.45	6.62		0.29	0.817902

## Sheet: IL-17
Sample	GAPDH	IL-17	ΔCt	meanΔCt	ΔΔCt	2^(-ΔΔCt)
Control1	19.16	26.75	7.59	7.63667	-0.0466667	1.03288
Control2	19.73	27.76	8.03		0.393333	0.761368
Control3	22.81	29.79	6.98		-0.656667	1.57644
Control4	22.82	29.32	6.5		-1.13667	2.19872
Control5	19.67	28.96	9.29		1.65333	0.317905
Control6	19.88	27.31	7.43		-0.206667	1.15402
AECOPD1	19.12	25.59	6.47		-1.16667	2.24492
AECOPD2	19.09	25.8	6.71		-0.926667	1.90088
AECOPD3	19.08	26.54	7.46		-0.176667	1.13027
AECOPD4	19.08	25.4	6.32		-1.31667	2.4909
AECOPD5	18.95	25.73	6.78		-0.856667	1.81085
AECOPD6	18.94	25.64	6.7		-0.936667	1.9141
CAM1	19.32	26.25	6.93		-0.706667	1.63203
CAM2	19.27	26.19	6.92		-0.716667	1.64338
CAM3	19.76	26.22	6.46		-1.17667	2.26054
CAM4	18.97	25.89	6.92		-0.716667	1.64338
CAM5	19.92	27.8	7.88		0.243333	0.844791
CAM6	19.86	27.82	7.96		0.323333	0.799221
LQZS1	19.56	27.15	7.59		-0.0466667	1.03288
LQZS2	19.94	27.18	7.24		-0.396667	1.31646
LQZS3	19.62	26.16	6.54		-1.09667	2.1386
LQZS4	19.92	28.28	8.36		0.723333	0.605696
LQZS5	19.85	26.23	6.38		-1.25667	2.38943
LQZS6	19.83	27.3	7.47		-0.166667	1.12246

## Sheet: IL-10
Sample	GAPDH	IL-10	ΔCt	meanΔCt	ΔΔCt	2^(-ΔΔCt)
Control1	19.16	28.81	9.65	9.165	0.485	0.714497
Control2	19.73	28.93	9.2		0.035	0.976032
Control3	22.81	31.43	8.62		-0.545	1.45902
Control4	22.82	31.27	8.45		-0.715	1.64148
Control5	19.67	29.18	9.51		0.345	0.787308
Control6	19.88	29.44	9.56		0.395	0.760489
AECOPD1	19.12	29.57	10.45		1.285	0.410371
AECOPD2	19.09	29.53	10.44		1.275	0.413225
AECOPD3	19.08	29.75	10.67		1.505	0.35233
AECOPD4	19.08	29.79	10.71		1.545	0.342696
AECOPD5	18.95	29.04	10.09		0.925	0.526681
AECOPD6	18.94	29.65	10.71		1.545	0.342696
CAM1	19.32	28.55	9.23		0.065	0.955945
CAM2	19.27	29.01	9.74		0.575	0.671286
CAM3	19.76	29.65	9.89		0.725	0.604997
CAM4	18.97	28.96	9.99		0.825	0.564482
CAM5	19.92	29.78	9.86		0.695	0.617709
CAM6	19.86	28.89	9.03		-0.135	1.09809
LQZS1	19.56	29.16	9.6		0.435	0.739694
LQZS2	19.94	29.71	9.77		0.605	0.657471
LQZS3	19.62	29.56	9.94		0.775	0.584389
LQZS4	19.92	29.89	9.97		0.805	0.572362
LQZS5	19.85	29	9.15		-0.015	1.01045
LQZS6	19.83	28.97	9.14		-0.025	1.01748

## Sheet: NE
Sample	GAPDH	NE	ΔCt	meanΔCt	ΔΔCt	2^(-ΔΔCt)
Control1	19.16	23.52	4.36	4.22333	0.136667	0.909618
Control2	19.73	23.57	3.84		-0.383333	1.30435
Control3	22.81	26.54	3.73		-0.493333	1.40769
Control4	22.82	26.56	3.74		-0.483333	1.39797
Control5	19.67	24.66	4.99		0.766667	0.587774
Control6	19.88	24.56	4.68		0.456667	0.728668
AECOPD1	19.12	23.25	4.13		-0.0933333	1.06683
AECOPD2	19.09	23.01	3.92		-0.303333	1.23399
AECOPD3	19.08	23.14	4.06		-0.163333	1.11987
AECOPD4	19.08	23.11	4.03		-0.193333	1.1434
AECOPD5	18.95	23.12	4.17		-0.0533333	1.03766
AECOPD6	18.94	23.08	4.14		-0.0833333	1.05946
CAM1	19.32	23.58	4.26		0.0366667	0.974905
CAM2	19.27	23.61	4.34		0.116667	0.922316
CAM3	19.76	23.61	3.85		-0.373333	1.29534
CAM4	18.97	23.13	4.16		-0.0633333	1.04488
CAM5	19.92	24.13	4.21		-0.0133333	1.00928
CAM6	19.86	24	4.14		-0.0833333	1.05946
LQZS1	19.56	23.62	4.06		-0.163333	1.11987
LQZS2	19.94	24.62	4.68		0.456667	0.728668
LQZS3	19.62	23.59	3.97		-0.253333	1.19196
LQZS4	19.92	24.29	4.37		0.146667	0.903335
LQZS5	19.85	23.49	3.64		-0.583333	1.49831
LQZS6	19.83	23.48	3.65		-0.573333	1.48796

## Sheet: MCP-1
Sample	GAPDH	MCP-1	ΔCt	meanΔCt	ΔΔCt	2^(-ΔΔCt)
Control1	19.16	22.99	3.83	3.795	0.035	0.976032
Control2	19.73	23.94	4.21		0.415	0.750019
Control3	22.81	26.22	3.41		-0.385	1.30586
Control4	22.82	26.17	3.35		-0.445	1.36131
Control5	19.67	23.61	3.94		0.145	0.904379
Control6	19.88	23.91	4.03		0.235	0.849685
AECOPD1	19.12	22.72	3.6		-0.195	1.14472
AECOPD2	19.09	22.83	3.74		-0.055	1.03886
AECOPD3	19.08	22.81	3.73		-0.065	1.04608
AECOPD4	19.08	22.94	3.86		0.065	0.955945
AECOPD5	18.95	22.5	3.55		-0.245	1.18509
AECOPD6	18.94	22.3	3.36		-0.435	1.35191
CAM1	19.32	23.17	3.85		0.055	0.962594
CAM2	19.27	23.21	3.94		0.145	0.904379
CAM3	19.76	23.61	3.85		0.055	0.962594
CAM4	18.97	22.93	3.96		0.165	0.891929
CAM5	19.92	23.98	4.06		0.265	0.832199
CAM6	19.86	23.92	4.06		0.265	0.832199
LQZS1	19.56	23.56	4		0.205	0.867539
LQZS2	19.94	23.98	4.04		0.245	0.843816
LQZS3	19.62	23.56	3.94		0.145	0.904379
LQZS4	19.92	23.92	4		0.205	0.867539
LQZS5	19.85	23.87	4.02		0.225	0.855595
LQZS6	19.83	23.95	4.12		0.325	0.798298
