# Supplementary material for: Louqin Zhisou Decoction Inhibits Mucus Hypersecretion for Acute Exacerbation of Chronic Obstructive Pulmonary Disease Rats by Suppressing EGFR-PI3K-AKT Signaling Pathway and Restoring Th17/Treg Balance
Source: Evid Based Complement Alternat Med. 2019 Jan 20;2019:6471815. doi: 10.1155/2019/6471815 (PMC6360623; doi:10.1155/2019/6471815)
Supplement: Supplementary Materials — Lung Function.xlsx contains the result of FEV0.3, FVC, FEV0.3/FVC, and MVV. ABPAS.xlsx contains the result of ABPAS-positive staining areas of epithelium. ELISA.xlsx contains the result of IL-6, IL-17, IL-10, TNF-α, and TGF-β. Western Blot.xlsx contains the result of phosphorylation levels of EGFR, PI3K, and AKT and the level of MUC5AC, NE, MCP-1, RORγt, and Foxp3. RT-PCR.xlsx contains the result of relative mRNA levels of MUC5AC, NE, MCP-1, RORγt, Foxp3, IL-17, and IL-10. [file 6471815.f1.zip › Werstern Blot.xlsx]

## Sheet: EGFR
Sample	p-EGFR	EGFR	p-EGFR/EGFR
Control1	36504.1	91979	0.396874
Control2	33203.3	81527.9	0.407263
Control3	38112	84291.6	0.452144
Control4	30498.7	80818.7	0.377371
Control5	39707.9	88606.4	0.448138
Control6	40335	84645.6	0.476516
AECOPD1	69524.2	85233.7	0.815689
AECOPD2	60847.2	87053.3	0.698965
AECOPD3	61909.7	84208.4	0.735196
AECOPD4	60613.1	87134	0.695631
AECOPD5	60140.9	85469.3	0.703655
AECOPD6	62718.8	84625.8	0.741131
CAM1	59545.6	79564.8	0.748392
CAM2	52017.4	82811.3	0.628144
CAM3	51645.9	81142.1	0.636486
CAM4	53388.4	86769.2	0.615291
CAM5	57067.4	87971.6	0.648703
CAM6	58296	81099.2	0.718824
LQZS1	57888	87723.9	0.659889
LQZS2	54173.1	86164.2	0.628719
LQZS3	54114.1	80683	0.6707
LQZS4	56495	89076.6	0.634229
LQZS5	50165.3	88044.5	0.569772
LQZS6	54758.4	82320.7	0.665184

## Sheet: PI3K
Sample	p-PI3K	PI3K	p-PI3K/PI3K
Control1	8686.41	43861.7	0.198041
Control2	10996	41661.3	0.263939
Control3	6714.6	42536.9	0.157853
Control4	11981.9	42312.2	0.283177
Control5	8041.87	44838.1	0.179354
Control6	6899.27	39045.7	0.176697
AECOPD1	31062.3	39360.7	0.78917
AECOPD2	31677.5	42029.6	0.753695
AECOPD3	29268.3	44607.9	0.656124
AECOPD4	31358.1	38437.8	0.815812
AECOPD5	29884.6	39579.4	0.755053
AECOPD6	28568.5	37207.2	0.76782
CAM1	14168.2	33343.6	0.424915
CAM2	12133.6	37336.9	0.324975
CAM3	12175.1	43398.9	0.28054
CAM4	12539.7	41270	0.303846
CAM5	16301.5	39479	0.412915
CAM6	15504	36580.5	0.423833
LQZS1	15081.4	40766.2	0.369949
LQZS2	11531.9	36084.8	0.319579
LQZS3	11776.8	42844.1	0.274876
LQZS4	14379.1	41972.8	0.342581
LQZS5	12238.2	40372.3	0.303133
LQZS6	10583.4	39887.8	0.265328

## Sheet: AKT
Sample	p-AKT	AKT	p-AKT/AKT
Control1	11918.2	38706.1	0.307915
Control2	10122	39387.9	0.256982
Control3	9166.45	37251.3	0.246071
Control4	8160.91	42973.3	0.189907
Control5	9370.43	42701.7	0.219439
Control6	9105.23	42916.1	0.212164
AECOPD1	36683.3	41904.8	0.875396
AECOPD2	36507.1	37194.4	0.981522
AECOPD3	30422.4	43488.1	0.699557
AECOPD4	30267	37249.8	0.81254
AECOPD5	32684.7	38720.2	0.844124
AECOPD6	33652.7	37555.7	0.896074
CAM1	10096.3	43819.9	0.230403
CAM2	11110.4	36291.4	0.306145
CAM3	13929.2	40320.8	0.345461
CAM4	14755.8	38879	0.379531
CAM5	14462.9	40971.9	0.352997
CAM6	14943.9	42874	0.348555
LQZS1	8254.36	42816.6	0.192784
LQZS2	13516.4	35120.1	0.384862
LQZS3	15798.2	37173.5	0.424986
LQZS4	10538.3	41102.5	0.256391
LQZS5	14527	42431.5	0.342363
LQZS6	11508.4	36319.2	0.316868

## Sheet: MUC5AC
Sample	MUC5AC	β-actin	MUC5AC/β-actin
Control1	59246.9	93442.6	0.634047
Control2	63608.2	89267.9	0.712554
Control3	58584.8	93303	0.627898
Control4	65212.6	91659	0.71147
Control5	65119.2	92081.6	0.70719
Control6	53652.7	93378.3	0.574574
AECOPD1	106907	95571.5	1.11861
AECOPD2	93115.9	86107.1	1.0814
AECOPD3	95267.3	89054.4	1.06977
AECOPD4	97598.6	85944.7	1.1356
AECOPD5	115474	93344	1.23708
AECOPD6	94490.4	88393.3	1.06898
CAM1	80293.5	92978.9	0.863567
CAM2	97112.8	94528.5	1.02734
CAM3	91892.8	87024.2	1.05595
CAM4	100998	94054.2	1.07383
CAM5	96405.2	86541.6	1.11398
CAM6	100914	89650.2	1.12564
LQZS1	34662	86764.8	0.399494
LQZS2	39767.2	91479.6	0.434711
LQZS3	39064.5	94414.8	0.413754
LQZS4	37863.6	85775	0.44143
LQZS5	35453.8	87973.7	0.403005
LQZS6	37802.7	91722.1	0.412143

## Sheet: RORγt
Sample	RORγt	β-actin	RORγt/β-actin
Control1	25092.6	76121	0.329642
Control2	25443.7	81558.1	0.31197
Control3	21286.5	80954.4	0.262944
Control4	21837.1	86697.8	0.251876
Control5	21916.1	76767.6	0.285486
Control6	24033.7	80563.4	0.298321
AECOPD1	36207.8	84756.8	0.427196
AECOPD2	35018.1	78151.8	0.448078
AECOPD3	33314	84122.2	0.396019
AECOPD4	36999.5	79511.7	0.465334
AECOPD5	37857.1	86697	0.43666
AECOPD6	38264.9	79936.5	0.478691
CAM1	15593.6	86575.9	0.180114
CAM2	18154.2	76771.1	0.236472
CAM3	18733.8	85428.2	0.219293
CAM4	18846.2	83544.4	0.225583
CAM5	20241.7	86808.5	0.233177
CAM6	13333.3	78039.7	0.170852
LQZS1	13370.5	85814.5	0.155808
LQZS2	11115.7	76589	0.145134
LQZS3	16462.8	84084.1	0.19579
LQZS4	13155.5	75219.8	0.174894
LQZS5	11074.2	76323.7	0.145095
LQZS6	14127.4	81279.3	0.173812

## Sheet: Foxp3
Sample	Foxp3	β-actin	Foxp3/β-actin
Control1	43021.4	75715.5	0.568198
Control2	41815.6	81893.1	0.510612
Control3	47572.5	78284	0.607691
Control4	59519.5	85111.2	0.699315
Control5	50182.8	83808.9	0.598776
Control6	49232.9	85113.6	0.578438
AECOPD1	26375.9	88462	0.298161
AECOPD2	34410.5	78626.4	0.437646
AECOPD3	30484	83869	0.363471
AECOPD4	33505.6	76500.1	0.437981
AECOPD5	33995.3	83675.8	0.406274
AECOPD6	26288.7	86045.5	0.305521
CAM1	44857.3	85178.4	0.526628
CAM2	41056.5	84083	0.488285
CAM3	42991.1	81741.9	0.525937
CAM4	45253.6	82177.9	0.550679
CAM5	41811.9	84267.4	0.496182
CAM6	45589.2	89452.5	0.509647
LQZS1	50212.7	85055.3	0.590353
LQZS2	47587.4	89705.4	0.530485
LQZS3	47942.8	85957.8	0.557749
LQZS4	48462	76344.7	0.634779
LQZS5	47848	84871.8	0.563768
LQZS6	48351.9	75166.8	0.643262

## Sheet: NE
Sample	NE	β-actin	NE/β-actin
Control1	34129.6	69704.2	0.489635
Control2	29933.5	66264.5	0.451727
Control3	36459.2	56049.6	0.65048
Control4	35293.5	60779.1	0.580685
Control5	32933.6	59158.7	0.556699
Control6	31672.7	68613	0.461614
AECOPD1	79940.7	76257.5	1.0483
AECOPD2	65812.6	64902.9	1.01402
AECOPD3	72203.2	62660.4	1.15229
AECOPD4	72948.5	73841.2	0.98791
AECOPD5	70365.1	55505.1	1.26772
AECOPD6	79753.2	59528.1	1.33976
CAM1	40397.5	73253.2	0.551478
CAM2	30386.9	69370.8	0.438036
CAM3	27360.2	68592.4	0.398881
CAM4	32932.6	63517.8	0.518478
CAM5	32590.1	56236.2	0.579522
CAM6	29198.1	66660.2	0.438015
LQZS1	48541	57475.8	0.844547
LQZS2	38276.8	62963.2	0.607923
LQZS3	39034.8	58403.4	0.668366
LQZS4	45321.6	57874.7	0.783099
LQZS5	37763.4	62906.2	0.600314
LQZS6	40044	62398.1	0.64175

## Sheet: MCP-1
Sample	MCP-1	β-actin	MCP/β-actin
Control1	15264	56897.7	0.268271
Control2	17201	43304	0.397214
Control3	16683.9	37151.6	0.449077
Control4	21767	37117.5	0.586435
Control5	20298.8	44055.2	0.46076
Control6	18689.3	54559.9	0.342547
AECOPD1	52420.3	44351.1	1.18194
AECOPD2	49075.6	43428	1.13005
AECOPD3	49972	40334.1	1.23895
AECOPD4	48965.7	48775	1.00391
AECOPD5	51139.9	55521	0.921091
AECOPD6	50472	41377.7	1.21979
CAM1	47282.7	34165.1	1.38395
CAM2	41893.3	40356.8	1.03807
CAM3	44540.5	54546.4	0.81656
CAM4	44607.8	37770.4	1.18102
CAM5	42695.2	38647.4	1.10474
CAM6	43458	42000.5	1.0347
LQZS1	40196.4	36380	1.1049
LQZS2	38404.6	37550.3	1.02275
LQZS3	37853.8	40054.3	0.945061
LQZS4	36054.6	34986.4	1.03053
LQZS5	39202.9	56508.2	0.693757
LQZS6	36778.3	40465.3	0.908885
